# Supplementary material for: Thermal Processing via Air Frying Improves the Antioxidant Properties of Brassica Vegetables
Source: Preprints.org preprint supplement (doi:10.20944/preprints202302.0021.v1), 2023-02-02
Supplement: Supplementary file 3 [file supplementary]

# **Supplementary Data**

**Figure S1**: Total phenolic content standard curve using gallic acid solution (1mM) as standard (GAE - gallic acid equivalents, mg - miligram, mL - mililiter, nm – nanometer, R2 - coefficient of variance)

# **Supplementary Data**

**Figure S2:** Total flavonoid content standard curve using quercetin solution (1mM) as standard (QE - qercetin equivalents, nm - nanometer, mg - miligram, mL - mililiter, R2 - coefficient of variance)

# **Supplementary Data**

**Figure S3:** Standard curve for antioxidant activity by FRAP using trolox stnadard solution (1mM)

(TE - trolox equivalents, nm - nanometer, mg - miligram, mL - mililiter, R2 - coefficient of variance)

# **Supplementary Data**

**Figure S4:** Standard curve for antioxidant activity by metal ion chelating activity using Na2EDTA stnadard solution (EDTAE - EDTA equivalents, nm - nanometer, mg - miligram, mL - mililiter, R2 - coefficient of variance)

# **Supplementary Data**

**Figure S5:** Standard curve for antioxidant activity by ABTS activity using trolox stnadard solution (TE - trolox equivalents, nm - nanometer, mg - miligram, mL - mililiter, R2 - coefficient of variance)
